# Supplementary material
Source: MDPI journal article supplement (https://www.mdpi.com/2076-3417/11/9/4041)
Supplement: s1 [file s1]

# Supplementary Information

## Preparation and application of ZIF-8 thin layers

Martin Schernikau<sup>1\*</sup>, Jakob Sablowski<sup>2\*</sup>, Ignacio G. Gonzalez Martinez<sup>1</sup>, Simon Unz<sup>2</sup>, Stefan Kaskel<sup>3</sup>, Daria Mikhailova<sup>1</sup>

### 1. Apparent contact angles

Apparent (as placed) contact angles were measured with the same setup as the advancing and receding contact angles using the sessile drop method. Drop volumes were between 1  $\mu\text{L}$  and 4  $\mu\text{L}$  and the conic section fitting method was used for drop shape analysis. Table S1 shows the apparent contact angles.

**Table S1.** Apparent contact angles.

| Surface                              | Oil                        | Water<br>$\theta_s$ / deg                              | Diiodomethane<br>$\theta_s$ / deg                    |
|--------------------------------------|----------------------------|--------------------------------------------------------|------------------------------------------------------|
| ZIF-8/<br>PVDF (20%)<br>mono layer   | none<br>GPL 100<br>GPL 105 | $127.4 \pm 12.2$<br>$121.4 \pm 3.8$<br>$116.5 \pm 9.0$ | $117.2 \pm 3.7$<br>$98.3 \pm 1.0$<br>$102.0 \pm 7.0$ |
| ZIF-8/<br>PVDF (20%)<br>double layer | none<br>GPL 100<br>GPL 105 | $139.2 \pm 3.4$<br>$123.6 \pm 2.3$<br>$107.3 \pm 9.6$  | $114.4 \pm 2.2$<br>$95.8 \pm 7.3$<br>$86.7 \pm 3.6$  |
| ZIF-8/<br>PVDF (10%)                 | GPL 105                    | $119.3 \pm 2.1$                                        | -                                                    |
| ZIF-8/<br>PVDF (40%)                 | GPL 105                    | $119.1 \pm 1.4$                                        | -                                                    |
| ZIF-8<br>(pellet)                    | GPL 105                    | $112.1 \pm 2.8$                                        | $88.8 \pm 2.1$                                       |
| ZIF-8<br>(e-coating)                 | GPL 105                    | $111.7 \pm 3.8$                                        | $88.9 \pm 2.7$                                       |
| PVDF                                 | none                       | $101.4 \pm 0.9$                                        | $78.3 \pm 3.4$                                       |

### 2. XRD data

Figure S1 shows the XRD pattern of the ZIF-8/PVDF composite monolayer.

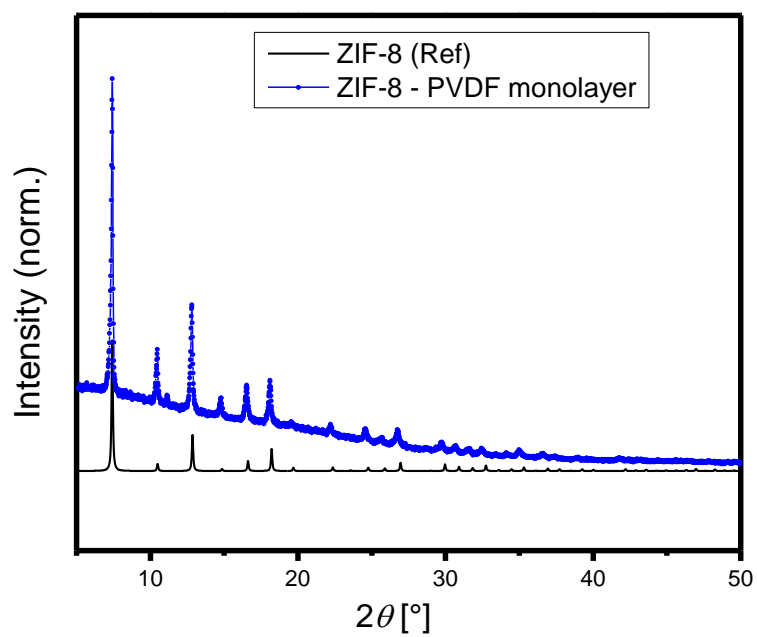

**Figure S1.** X-ray diffraction pattern of the ZIF-8/PVDF composite monolayer, Cu K $\alpha$ 1-radiation,  $\lambda$  = 1.54056 Å.

### 3. TEM/EDS data

Figure S2 shows TEM imaging with an EDS spectrum of the ZIF-8/PVDF composite.

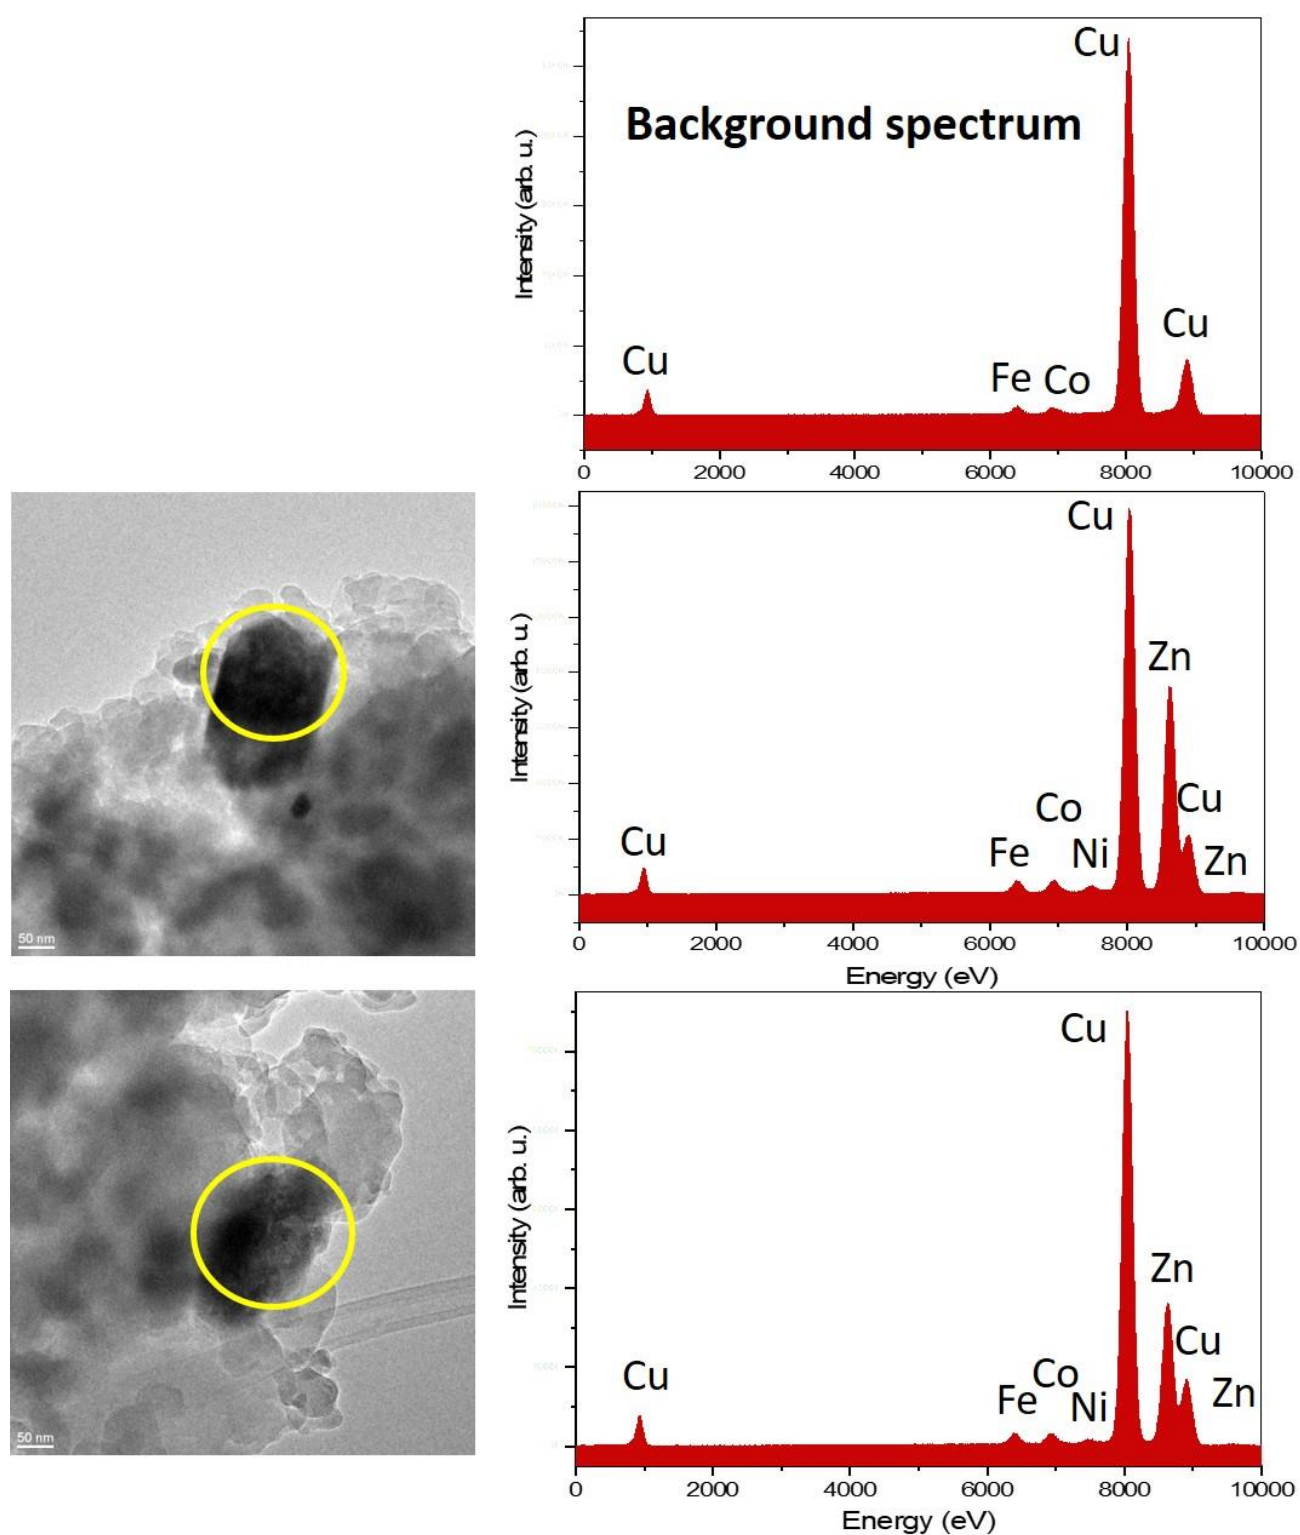

**Figure S2.** TEM imaging with EDS spectrum; the EDS area is marked (yellow). By comparing the spectra obtained from the particles with the background spectrum (e-beam not aimed at the sample or the grid), one can easily identify the Zn peaks as coming from the particles.

#### 4. Electrochemical setup

Figure S3 shows the electrochemical setup with a Cu plate as a working electrode. Between the Cu plate and synthesis cell a rubber ring was added, to ensure that the whole cell is liquid-tight. The copper plate can be removed after synthesis by turning the whole cell upside down and the bottom plate can be removed by loosening the screws.

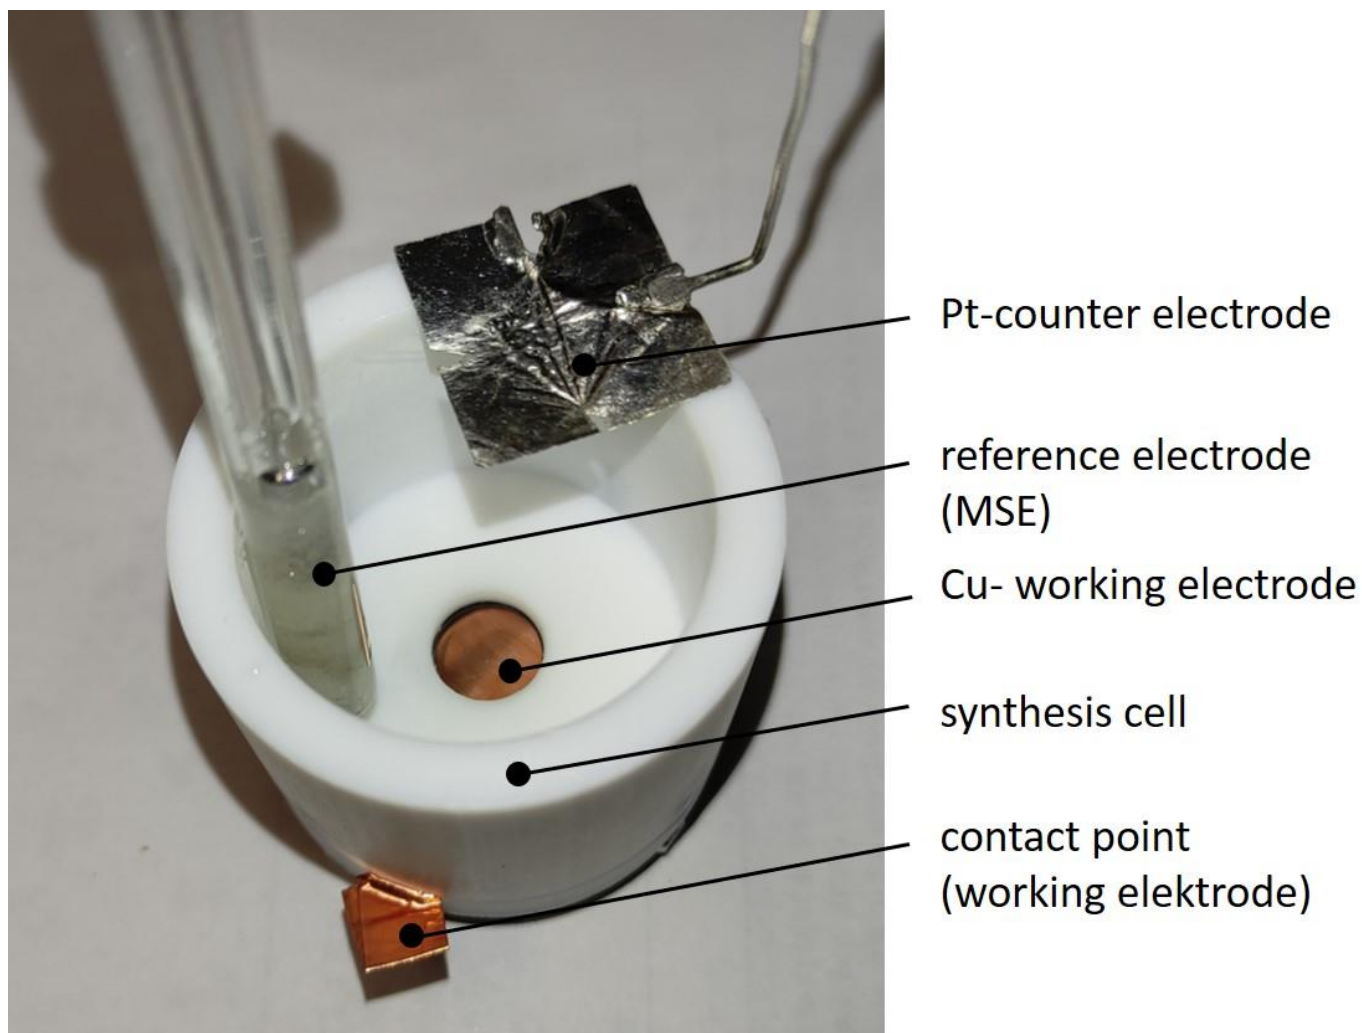

**Figure S3.** Electrochemical setup with the working and counter electrode as well as the MSE (reference electrode) and electrochemical contact point.
